# Supplementary material for: Human Milk Oligosaccharides Variation in Gestational Diabetes Mellitus Mothers
Source: MDPI journal article supplement (doi:10.3390/nu15061441), 2023-03-16
Supplement: s1 [file s1]

Supplementary table S1-Baseline characteristics of subjects

|                                                |                           | Healthy<br>Group(N=11) | GDM<br>Group(N=11) | P<br>value |
|------------------------------------------------|---------------------------|------------------------|--------------------|------------|
| Mother's basic information                     |                           |                        |                    |            |
| Reproductive age(years,median(Q1-Q3))          |                           | 32(30,33)              | 31(29,33)          | 0.949      |
| Gestation(weeks,, $\bar{x} \pm s$ )            |                           | 39.818±0.796           | 39.564±0.609       | 0.409      |
| Production(%)                                  | Primiparous               | 9(81.8)                | 9(81.8)            | 1          |
|                                                | Multiparous               | 2(18.2)                | 2(18.2)            |            |
| Occupation(%)                                  | Professionals             | 3(27.3)                | 0                  | 0.214      |
|                                                | Office clerk              | 8(72.7)                | 11(100)            |            |
| Region(%)                                      | Beijing area              | 2(18.2)                | 1(13.6)            | 1          |
|                                                | Non-beijing area          | 9(81.8)                | 10(86.4)           |            |
| Education level<br>(Maternity) (%)             | Undergraduate and below   | 4(36.4)                | 6(66.7)            | 0.370      |
|                                                | Postgraduate and above    | 7(63.6)                | 3(33.3)            |            |
| Education level (Spouse)<br>(%)                | Undergraduate and below   | 2(18.2)                | 6(66.7)            | 0.065      |
|                                                | Postgraduate and above    | 9(81.8)                | 3(33.3)            |            |
| Monthly income per<br>family member(%)         | ≤15000                    | 5(45.5)                | 5(55.6)            | 1          |
|                                                | >15000                    | 6(54.5)                | 4(44.4)            |            |
| Premature rupture of<br>membranes(%)           | Yes                       | 1(9.1)                 | 2(18.2)            | 1          |
|                                                | No                        | 10(90.9)               | 9(81.8)            |            |
| Delivery(%)                                    | Vaginal delivery          | 8(72.7)                | 8(72.7)            | 1          |
|                                                | Cesarean delivery         | 3(27.3)                | 3(27.3)            |            |
| Body temperature(℃, $\bar{x} \pm s$ )          |                           | 36.56±0.32             | 35.56±3.10         | 0.286      |
| Pulse(bpm,median(Q1-Q3))                       |                           | 86(70,100)             | 80(80,80)          | 1          |
| Systolic pressure(mmHg, $\bar{x} \pm s$ )      |                           | 117.82±9.94            | 117.55±7.45        | 0.943      |
| Diastolic pressure(mmHg, $\bar{x} \pm s$ )     |                           | 72.36±8.52             | 73.09±5.70         | 0.816      |
| Height(cm, $\bar{x} \pm s$ )                   |                           | 164.64±4.43            | 162.00±6.02        | 0.256      |
| Pre-pregnancy weight(kg, $\bar{x} \pm s$ )     |                           | 55.00±4.49             | 58.64±4.88         | 0.084      |
| Current weight(kg, $\bar{x} \pm s$ )           |                           | 67.86±6.25             | 68.91±4.75         | 0.663      |
| Gestational weight gain (kg, $\bar{x} \pm s$ ) |                           | 12.86±4.40             | 10.27±4.54         | 0.189      |
| Allergic diseases<br>(Maternity)               | Yes                       | 6(54.5)                | 4(36.4)            | 0.670      |
|                                                | No                        | 5(45.5)                | 7(63.6)            |            |
| Allergic diseases (Spouse)                     | Yes                       | 5(45.5)                | 4(36.4)            | 1          |
|                                                | No                        | 6(54.5)                | 7(63.6)            |            |
| Infant's basic information                     |                           |                        |                    |            |
| Gender(%)                                      | Male                      | 5(45.5)                | 5(45.5)            | 1          |
|                                                | Female                    | 6(54.5)                | 6(54.5)            |            |
| Birth weight(g, $\bar{x} \pm s$ )              |                           | 3340.00±265.14         | 3498.18±339.55     | 0.237      |
| Birth length(cm, $\bar{x} \pm s$ )             |                           | 49.64±1.29             | 50.46±1.13         | 0.128      |
| Birth head circumference(cm, $\bar{x} \pm s$ ) |                           | 33.80±0.92             | 34.10±0.84         | 0.457      |
| Number of bowel movements (infants, 42days)    |                           | 3(2,3)                 | 3(3,4)             | 0.493      |
| Stool characteristics<br>(infants)             | Slightly shaped stools    | 7(63.6)                | 9(90)              | 0.311      |
|                                                | Watery stools/banana-like | 4(36.4)                | 1(10)              |            |

---

stools/soft stools

---

**Supplementary table 2 – Blood glucose for mothers and infants with GDM**

|                                                            | N  | Minimum | Maximum | Mean  | Std. Deviation |
|------------------------------------------------------------|----|---------|---------|-------|----------------|
| <b>GDM Diagnostic Information</b>                          |    |         |         |       |                |
| Gestational age when GDM was diagnosed (week)              | 11 | 24.0    | 26.5    | 25.26 | 0.68           |
| OGTT fasting glucose at 24-28 weeks pregnant (mmol/L)      | 11 | 4.4     | 5.3     | 5.14  | 0.28           |
| OGTT 1-hour blood glucose at 24-28 weeks pregnant (mmol/L) | 4  | 7.4     | 11.1    | 9.83  | 1.67           |
| OGTT 2-hour blood glucose at 24-28 weeks pregnant (mmol/L) | 4  | 6.6     | 9.3     | 8.23  | 1.24           |
| Infant's blood sugar at birth (mmol/L)                     | 9  | 2.30    | 6.60    | 3.81  | 1.52           |
| <b>Maternity checkup blood glucose level</b>               |    |         |         |       |                |
| Fasting at 30 weeks pregnant (mmol/L)                      | 10 | 4.56    | 5.76    | 5.06  | 0.35           |
| Fasting at 32 weeks pregnant (mmol/L)                      | 10 | 4.42    | 6.00    | 4.98  | 0.42           |
| Fasting at 34 weeks pregnant (mmol/L)                      | 10 | 3.85    | 5.70    | 5.08  | 0.56           |
| Fasting at 36 weeks pregnant (mmol/L)                      | 9  | 3.81    | 5.33    | 4.73  | 0.48           |
| Fasting at 38 weeks pregnant (mmol/L)                      | 5  | 4.31    | 5.50    | 5.03  | 0.45           |
| 2-hour postprandial at 30 weeks pregnant (mmol/L)          | 10 | 4.32    | 6.96    | 5.69  | 0.92           |
| 2-hour postprandial at 32 weeks pregnant (mmol/L)          | 10 | 4.57    | 9.10    | 6.18  | 1.37           |
| 2-hour postprandial at 34 weeks pregnant (mmol/L)          | 10 | 4.71    | 7.44    | 6.00  | 0.84           |
| 2-hour postprandial at 36 weeks pregnant (mmol/L)          | 8  | 4.75    | 7.76    | 6.03  | 0.90           |
| 2-hour postprandial at 38 weeks pregnant (mmol/L)          | 5  | 5.61    | 6.69    | 6.30  | 0.45           |

**Supplementary table 3-Distribution of the four milk types**

| <b>Phenotype</b>                    | <b>Total</b>     | <b>Healthy Group</b> | <b>GDM group</b> |
|-------------------------------------|------------------|----------------------|------------------|
| Se <sup>+</sup> Le <sup>+</sup> (%) | <b>15 (68.2)</b> | <b>8 (72.7)</b>      | <b>7 (63.6)</b>  |
| Se <sup>+</sup> Le <sup>-</sup> (%) | <b>0</b>         | <b>0</b>             | <b>0</b>         |
| Se <sup>-</sup> Le <sup>+</sup> (%) | <b>7 (31.8)</b>  | <b>3 (27.3)</b>      | <b>4 (36.4)</b>  |
| Se <sup>-</sup> Le <sup>-</sup> (%) | <b>0</b>         | <b>0</b>             | <b>0</b>         |

**The data is presented in n (%)**

**Supplementary table 4 - Other information about the infants in each group within 42 days of discharge from the hospital**

|                                                                               |                                              | <b>Healthy<br/>Group</b> | <b>GDM<br/>Group</b> | <b><i>P</i><br/>value</b> |
|-------------------------------------------------------------------------------|----------------------------------------------|--------------------------|----------------------|---------------------------|
| Number of bowel movements (times,median(Q1-Q3))                               |                                              | 1(1,2)                   | 1(1,1)               | 0.180                     |
|                                                                               | Slightly shaped stools                       | 5(62.5)                  | 6(85.7)              | 0.338                     |
| Stool characteristics (%)                                                     | Watery stools/banana-like stools/soft stools | 3(37.5)                  | 1(14.3)              |                           |
| Whether the infant was sick within 42 days of discharge from the hospital (%) | Yes                                          | 1(12.5)                  | 0                    | 0.533                     |
|                                                                               | No                                           | 7(87.5)                  | 7(100.0)             |                           |
| Whether the infant was hospitalized within 42 days of discharge (%)           | Yes                                          | 1(12.5)                  | 0                    | 0.533                     |
|                                                                               | No                                           | 7(87.5)                  | 7(100.0)             |                           |
| Feeding status (%)                                                            | Breast feeding                               | 6(75.0)                  | 5(71.4)              | 1                         |
|                                                                               | Mixed feeding                                | 2(25.0)                  | 2(28.6)              |                           |
